# Supplementary material for: Ambient pressure synthesis of unstable bulk phases of strongly correlated rare-earth nickelates
Source: Royal Society of Chemistry journal article supplement (doi:10.1039/d2ma00415a), 2022-01-01
Supplement: d2ma00415a1.pdf [file d2ma00415a1.pdf]

## Supporting Information

# Ambient Pressure Synthesis of Unstable Bulk Phases of Strongly Correlated Rare-Earth Nickelates

Nicholas Smieszek,<sup>\* a</sup> Xinran Li,<sup>\* a</sup> and Vidhya Chakrapani,<sup># a §</sup>

<sup>a</sup> Howard P. Isermann Department of Chemical and Biological Engineering

<sup>§</sup> Department of Physics, Applied Physics, and Astronomy

Rensselaer Polytechnic Institute, Troy, New York-12180, USA

\* Equal contribution

# Corresponding author email: [chakrv@rpi.edu](mailto:chakrv@rpi.edu)

Table S1. Summary of the fitting results of the Rietveld refinement of XRD patterns reported in the manuscript.

|                                     | Figure | Rp (%) | Rwp (%) | Chi <sup>2</sup> |
|-------------------------------------|--------|--------|---------|------------------|
| SmNiO <sub>x</sub> - As synthesized | 1d     | 6.20   | 9.26    | 6.75             |
| SmNiO <sub>x</sub> - RT aged        | 3a     | 5.28   | 7.55    | 4.54             |
| SmNiO <sub>x</sub> - HT aged        | 3b     | 4.79   | 6.87    | 4.00             |
| NdNiO <sub>x</sub> - As synthesized | 1c     | 3.58   | 4.64    | 1.90             |
| NdNiO <sub>x</sub> -RT aged         | 2a     | 5.22   | 6.79    | 2.68             |
| NdNiO <sub>x</sub> -HT aged         | 2b     | 6.88   | 9.48    | 5.41             |

Table S2. Summary of XPS fitting analysis of Ni 2p<sub>3/2</sub> peak of NdNiO<sub>x</sub> and SmNiO<sub>x</sub> before and after aging done using the multiplet peaks of free Ni<sup>2+</sup> and Ni<sup>3+</sup> ions, as reported by Biesinger *et al.*

**SmNiO<sub>x</sub>- As synthesized**

| <i>Peak ID</i>       | <i>Energy (eV)</i> | <i>FWHM (eV)</i> | <i>%Area</i> |
|----------------------|--------------------|------------------|--------------|
| Ni <sup>2+</sup> - 1 | 853.7              | 1.0              | 36.79        |
| Ni <sup>2+</sup> - 2 | 855.7              | 2.25             | 8.5          |
| Ni <sup>3+</sup> - 3 | 854.6              | 1.4              | 25.75        |
| Ni <sup>3+</sup> - 4 | 855.3              | 1.5              | 4.85         |
| Ni <sup>3+</sup> - 5 | 855.7              | 1.4              | 14.77        |
| Ni <sup>3+</sup> - 6 | 856.5              | 1.4              | 9.32         |

**SmNiO<sub>x</sub>- Aged-RT**

| <i>Peak ID</i>       | <i>Energy (eV)</i> | <i>FWHM (eV)</i> | <i>%Area</i> |
|----------------------|--------------------|------------------|--------------|
| Ni <sup>2+</sup> - 1 | 853.7              | 1.0              | 21.99        |
| Ni <sup>2+</sup> - 2 | 855.7              | 2.25             | 0.019        |
| Ni <sup>3+</sup> - 3 | 854.6              | 1.4              | 28.69        |
| Ni <sup>3+</sup> - 4 | 855.3              | 1.5              | 17.2         |
| Ni <sup>3+</sup> - 5 | 855.7              | 1.4              | 11.47        |
| Ni <sup>3+</sup> - 6 | 856.5              | 1.4              | 20.63        |

**NdNiO<sub>x</sub>- As synthesized**

| <i>Peak ID</i>       | <i>Energy (eV)</i> | <i>FWHM (eV)</i> | <i>%Area</i> |
|----------------------|--------------------|------------------|--------------|
| Ni <sup>2+</sup> - 1 | 853.7              | 1.0              | 29.69        |
| Ni <sup>2+</sup> - 2 | 855.7              | 2.25             | 1.49         |
| Ni <sup>3+</sup> - 3 | 854.6              | 1.4              | 26.18        |
| Ni <sup>3+</sup> - 4 | 855.3              | 1.5              | 12.67        |
| Ni <sup>3+</sup> - 5 | 855.7              | 1.4              | 15.04        |
| Ni <sup>3+</sup> - 6 | 856.5              | 1.4              | 14.92        |

**NdNiO<sub>x</sub>- Aged-RT**

| <i>Peak ID</i>       | <i>Energy (eV)</i> | <i>FWHM (eV)</i> | <i>%Area</i> |
|----------------------|--------------------|------------------|--------------|
| Ni <sup>2+</sup> - 1 | 853.7              | 1.0              | 27.33        |

|                      |       |      |       |
|----------------------|-------|------|-------|
| Ni <sup>2+</sup> - 2 | 855.7 | 2.25 | 0.85  |
| Ni <sup>3+</sup> - 3 | 854.6 | 1.4  | 33.79 |
| Ni <sup>3+</sup> - 4 | 855.3 | 1.5  | 8.55  |
| Ni <sup>3+</sup> - 5 | 855.7 | 1.4  | 15.98 |
| Ni <sup>3+</sup> - 6 | 856.5 | 1.4  | 13.49 |

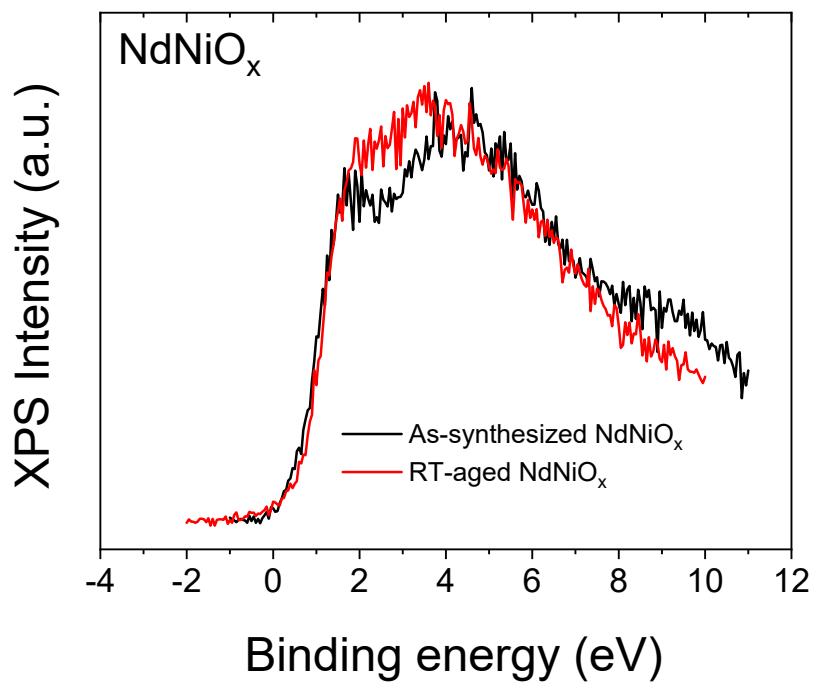

Figure S1. Valence band XPS spectrum of NdNiO<sub>x</sub> before and after RT-ageing. In both samples, the VB edge close to the  $E_F$  position indicates that both samples are p-type semiconductors.
